# Supplementary material
Source: Springer Nature journal article supplement (https://www.springermedizin.de/resource/supplementary/12906_2011_1039_MOESM2_ESM.pdf/9520304)

**A****Plasma  $\alpha$ -amylase activity**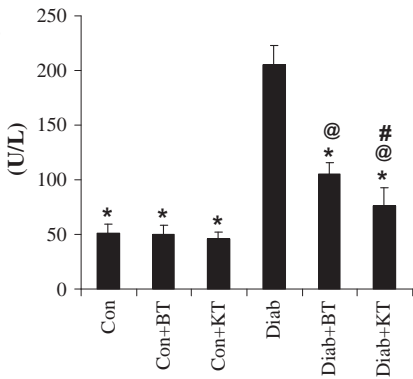**B****Pancreas  $\alpha$ -amylase activity**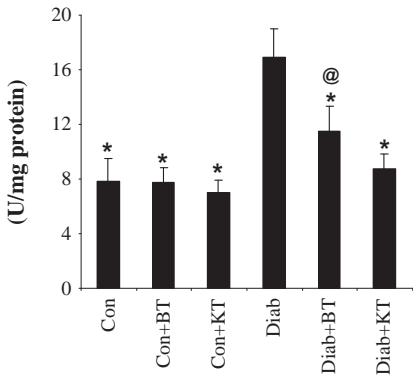**C****Glucose level in plasma**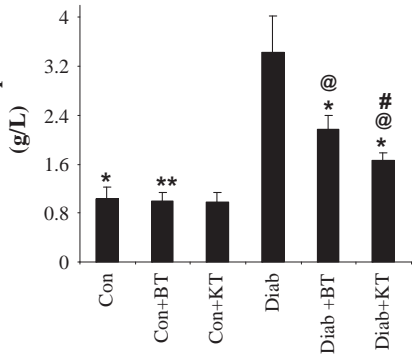

Supplement: MOESM2 [file 9520304]
